# Supplementary material
Source: Springer Nature journal article supplement (https://www.springermedizin.de/resource/supplementary/13046_2010_391_MOESM1_ESM.pdf/9661920)

**A**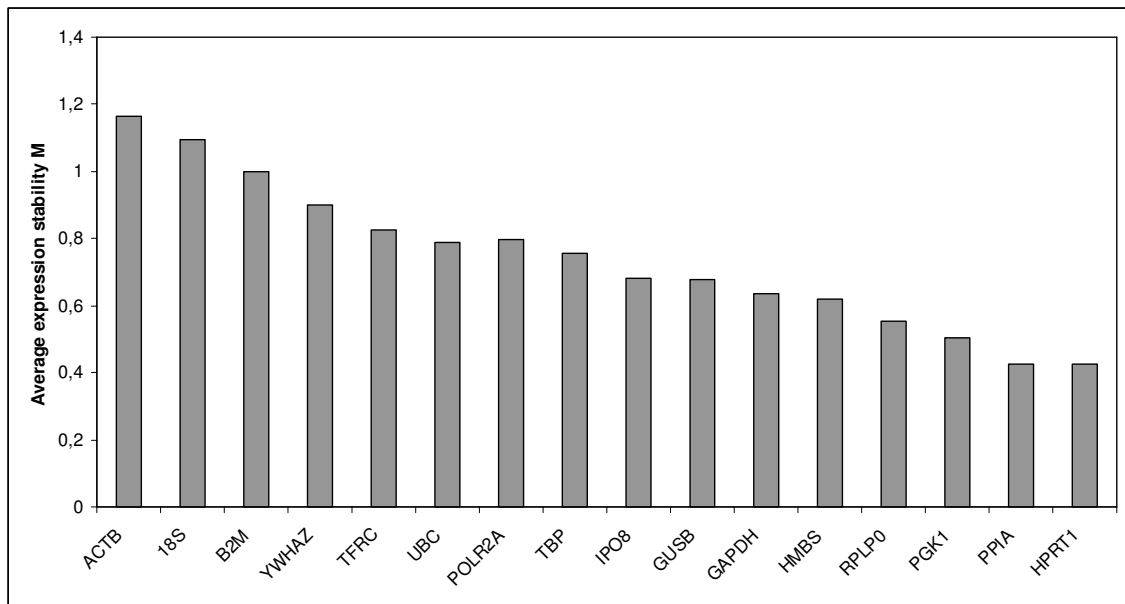**B**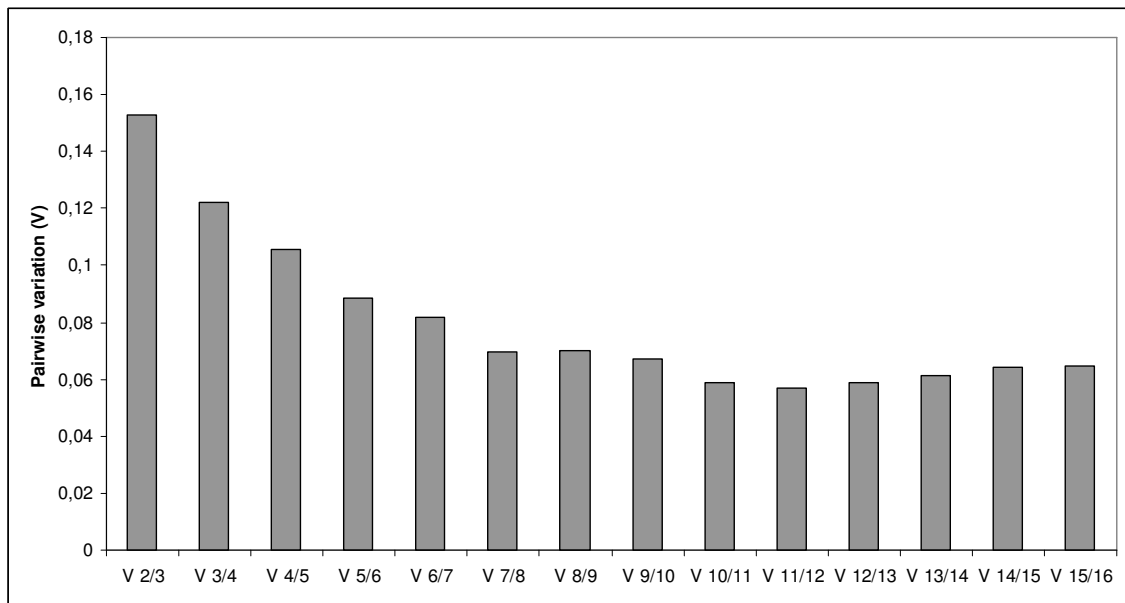

Supplement: MOESM1 [file 9661920]
